# Supplementary material
Source: Springer Nature journal article supplement (https://www.springermedizin.de/resource/supplementary/12943_2014_1387_MOESM5_ESM.pdf/9552862)
Supplement: MOESM5 [file 9552862]

## Additional file 5: Table S1

| Patient | p-AKT | HGF | c-MET | p-MET |
|---------|-------|-----|-------|-------|
| 1       | 3+    | 3+  | 3+    | 3+    |
| 2       | 3+    | 3+  | 3+    | 2+    |
| 3       | 3+    | 2+  | 3+    | 2+    |
| 4       | 3+    | 3+  | 3+    | 3+    |
| 5       | 3+    | 3+  | 3+    | 2+    |
| 6       | 3+    | 3+  | 2+    | 1+    |

2+, 3+: positive staining

0, 1+: negative staining
